# Supplementary material for: Elucidating the structure, redox properties and active entities of high-temperature thermally aged CuOx–CeO2 catalysts for CO-PROX
Source: Royal Society of Chemistry journal article supplement (doi:10.1039/d1cp01798e), 2021-01-01
Supplement: d1cp01798e1.pdf [file d1cp01798e1.pdf]

**Supporting information for**

**Elucidating the structure, redox properties and active entities of  
high-temperature thermal aged  $\text{CuO}_x\text{-CeO}_2$  catalysts for CO-  
PROX**

Zhihuan Qiu<sup>a</sup>, Xiaolin Guo<sup>b</sup>, Jianxin Mao<sup>a</sup>, Renxian Zhou<sup>a, \*</sup>

<sup>a</sup> Institute of Catalysis, Zhejiang University, Hangzhou 310028, P.R China

<sup>b</sup> College of Materials and Chemistry, China Jiliang University, Hangzhou 310018,  
P.R China

\*Corresponding author: Renxian Zhou Tel. and fax: +86 571 88273283.

E-mail address: [zhourenxian@zju.edu.cn](mailto:zhourenxian@zju.edu.cn).

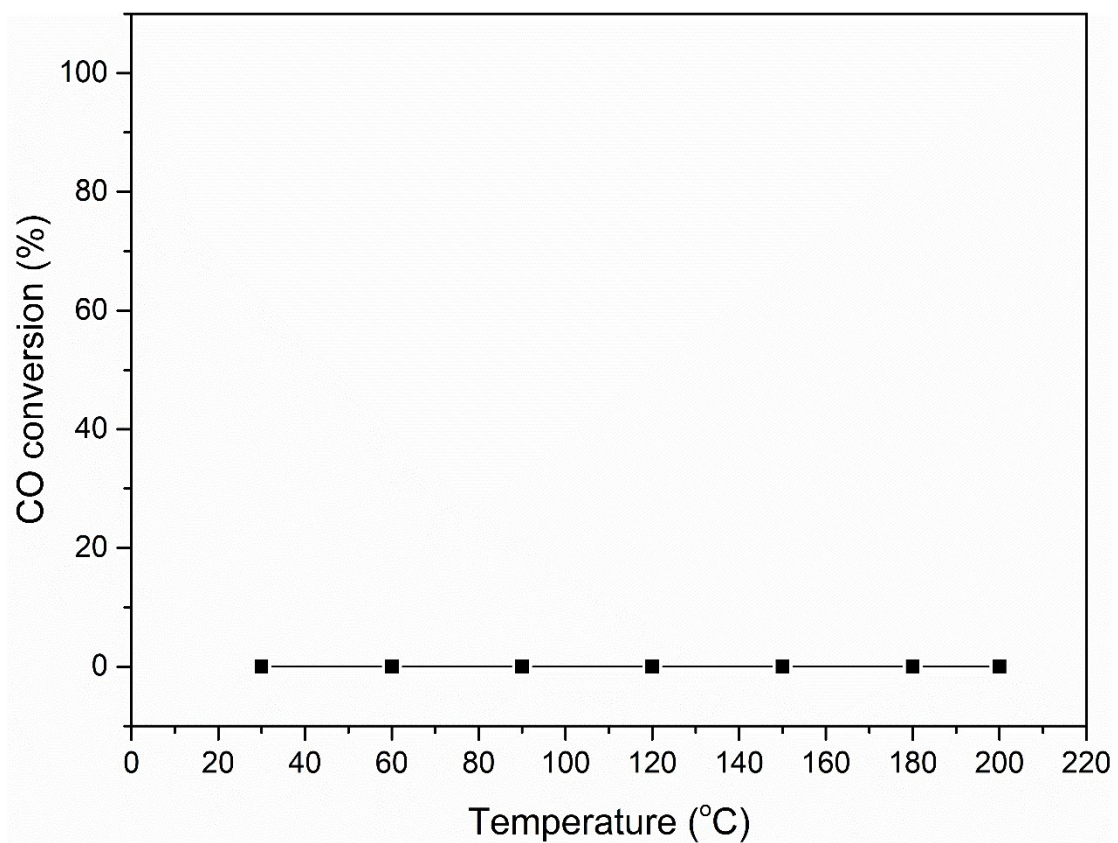

**Fig. S1** Catalytic performance of 0.1 g  $\alpha$ -Al<sub>2</sub>O<sub>3</sub> for CO-PROX (blank experiment).

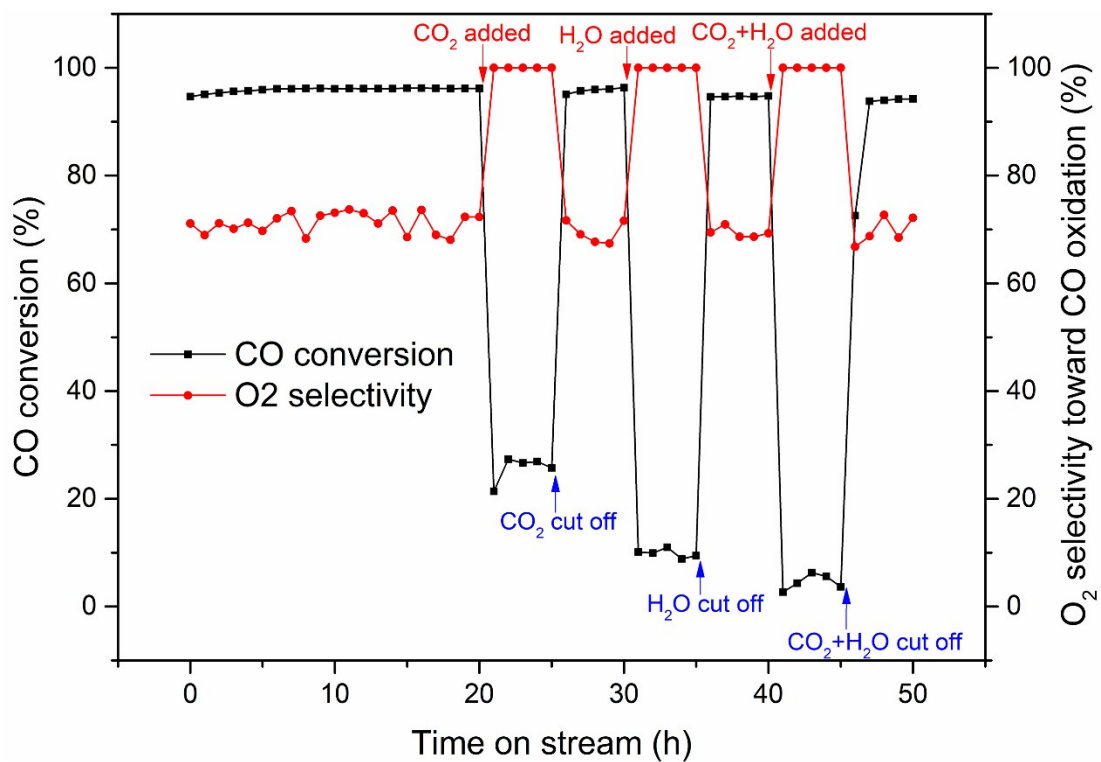

**Fig. S2** Catalytic performance of 7CuCe catalyst under 50 h CO-PROX reaction at 80 °C with H<sub>2</sub>O or/and CO<sub>2</sub> added.

**Table S1** Copper content of the CuO<sub>x</sub>-CeO<sub>2</sub> catalysts analyzed by ICP-AES.

| Catalyst | Copper content (wt%) |
|----------|----------------------|
| 1CuCe    | 0.7                  |
| 2CuCe    | 1.2                  |
| 5CuCe    | 3.3                  |
| 7CuCe    | 4.8                  |
| 10CuCe   | 7.1                  |
| 15CuCe   | 11.2                 |

**Table S2** Structure parameters of the CuO<sub>x</sub>-CeO<sub>2</sub> catalysts with 7% Cu content and different calcination temperature.

| Catalyst  | Weight percentage<br>of crystalline CuO<br>phase (%) | Lattice parameter<br>of CeO <sub>2</sub> (Å) | Grain size <sup>a</sup> (Å) | Microstrain <sup>a</sup><br>(10 <sup>-3</sup> ) |
|-----------|------------------------------------------------------|----------------------------------------------|-----------------------------|-------------------------------------------------|
| 7CuCe-200 | 0.4                                                  | 5.4104                                       | 38.0/32.7/36.2              | 10.4/5.70/9.46                                  |
| 7CuCe-300 | 0.2                                                  | 5.4121                                       | 42.3/39.1/41.4              | 8.14/4.55/7.41                                  |
| 7CuCe-400 | 0.3                                                  | 5.4128                                       | 51.9/49.8/51.3              | 5.46/3.19/4.99                                  |
| 7CuCe-500 | 0.5                                                  | 5.4127                                       | 63.8/62.6/63.4              | 3.98/2.77/3.72                                  |
| 7CuCe-600 | 0.9                                                  | 5.4123                                       | 77.4/76.8/77.2              | 2.62/1.95/2.47                                  |
| 7CuCe-700 | 4.3                                                  | 5.4100                                       | 139/153/142                 | 1.07/1.93/1.33                                  |

<sup>a</sup>The crystalline size and microstrain of the three crystal planes of CeO<sub>2</sub> basic grain, which are {111}, {100} and {110} from left to right.

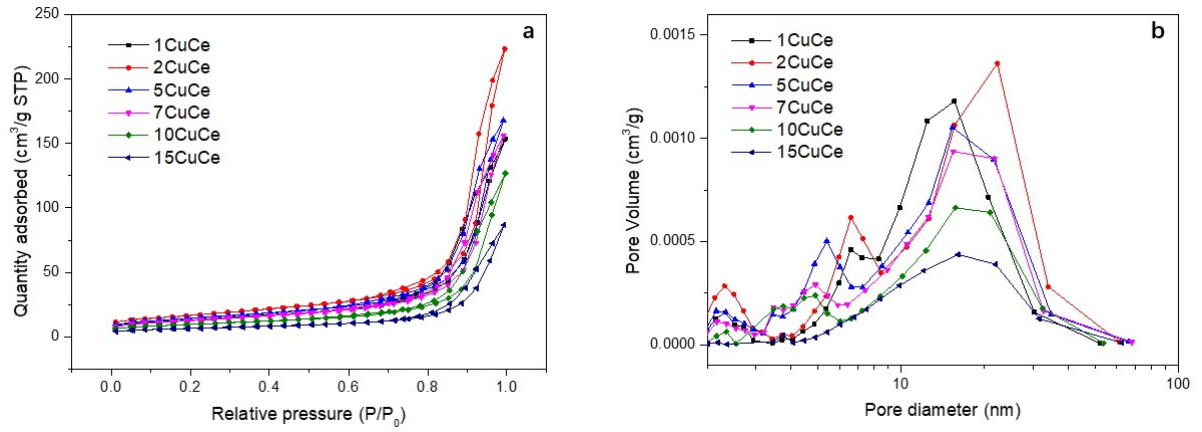

**Fig. S3** N<sub>2</sub> adsorption-desorption isotherms (a) and BJH desorption pore size distribution curves (b) of the CuO<sub>x</sub>-CeO<sub>2</sub> catalysts with different copper content.

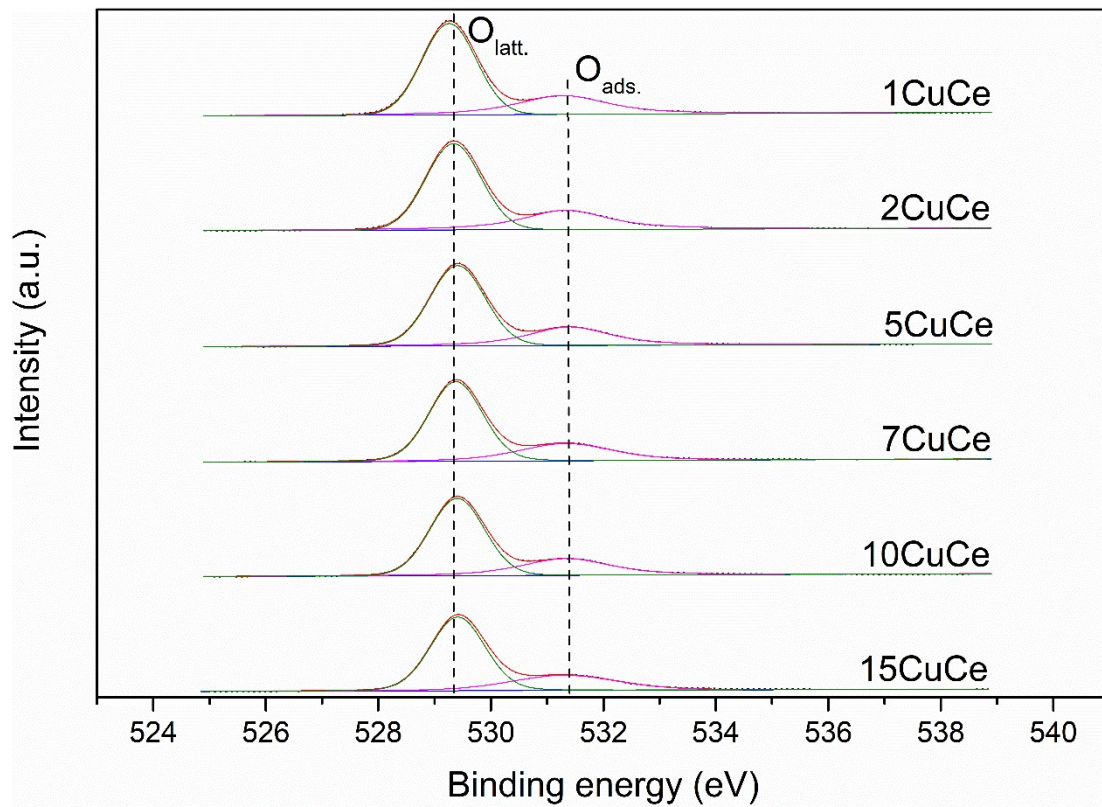

**Fig. S4** O 1s XPS spectra of the  $CuO_x-CeO_2$  catalysts.

**Table S3** Reduction temperature and H<sub>2</sub> consumption of H<sub>2</sub>-TPR peaks, T<sub>50%</sub> and operation temperature window of the CuO<sub>x</sub>-CeO<sub>2</sub> catalysts.

| Catalyst | Peak $\alpha$ |                            | Peak $\beta$ |                            | Peak $\gamma$ |                            | Total H <sub>2</sub>       | Theoretical H <sub>2</sub> |
|----------|---------------|----------------------------|--------------|----------------------------|---------------|----------------------------|----------------------------|----------------------------|
|          | Tem.          | H <sub>2</sub> cons.       | Tem.         | H <sub>2</sub> cons.       | Tem.          | H <sub>2</sub> cons.       | cons.                      | cons. by Cu <sup>2+</sup>  |
|          | (°C)          | ( $\mu\text{mol g}^{-1}$ ) | (°C)         | ( $\mu\text{mol g}^{-1}$ ) | (°C)          | ( $\mu\text{mol g}^{-1}$ ) | ( $\mu\text{mol g}^{-1}$ ) | ( $\mu\text{mol g}^{-1}$ ) |
| 1CuCe    | 148           | 105                        | 176          | 185                        | -             | -                          | 290                        | 157                        |
| 2CuCe    | 148           | 178                        | 172          | 255                        | -             | -                          | 433                        | 315                        |
| 5CuCe    | 141           | 238                        | 164          | 608                        | -             | -                          | 846                        | 787                        |
| 7CuCe    | 142           | 192                        | 161          | 315                        | 170           | 468                        | 975                        | 1102                       |
| 10CuCe   | 142           | 157                        | 164          | 352                        | 178           | 948                        | 1457                       | 1574                       |
| 15CuCe   | 146           | 114                        | 177          | 760                        | 199           | 1149                       | 2023                       | 2360                       |



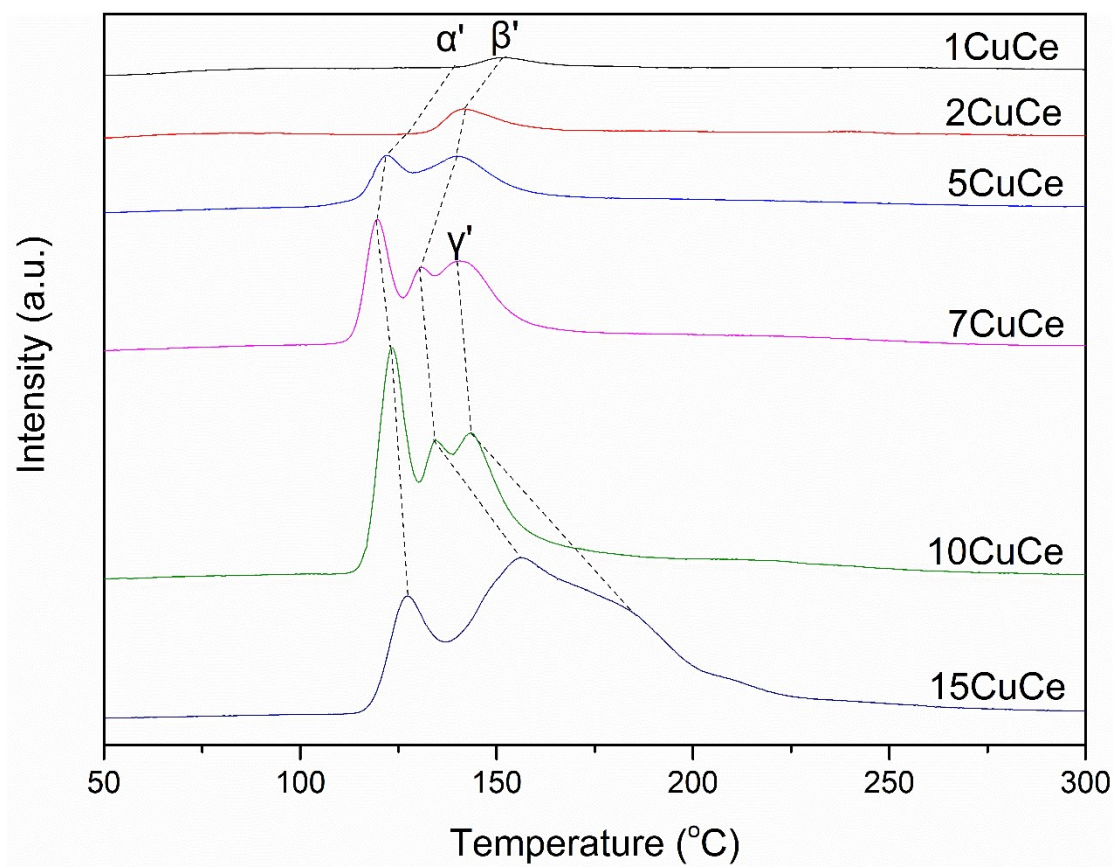

**Fig. S5** CO-TPR profiles of the  $\text{CuO}_x\text{-CeO}_2$  catalysts with different copper content.

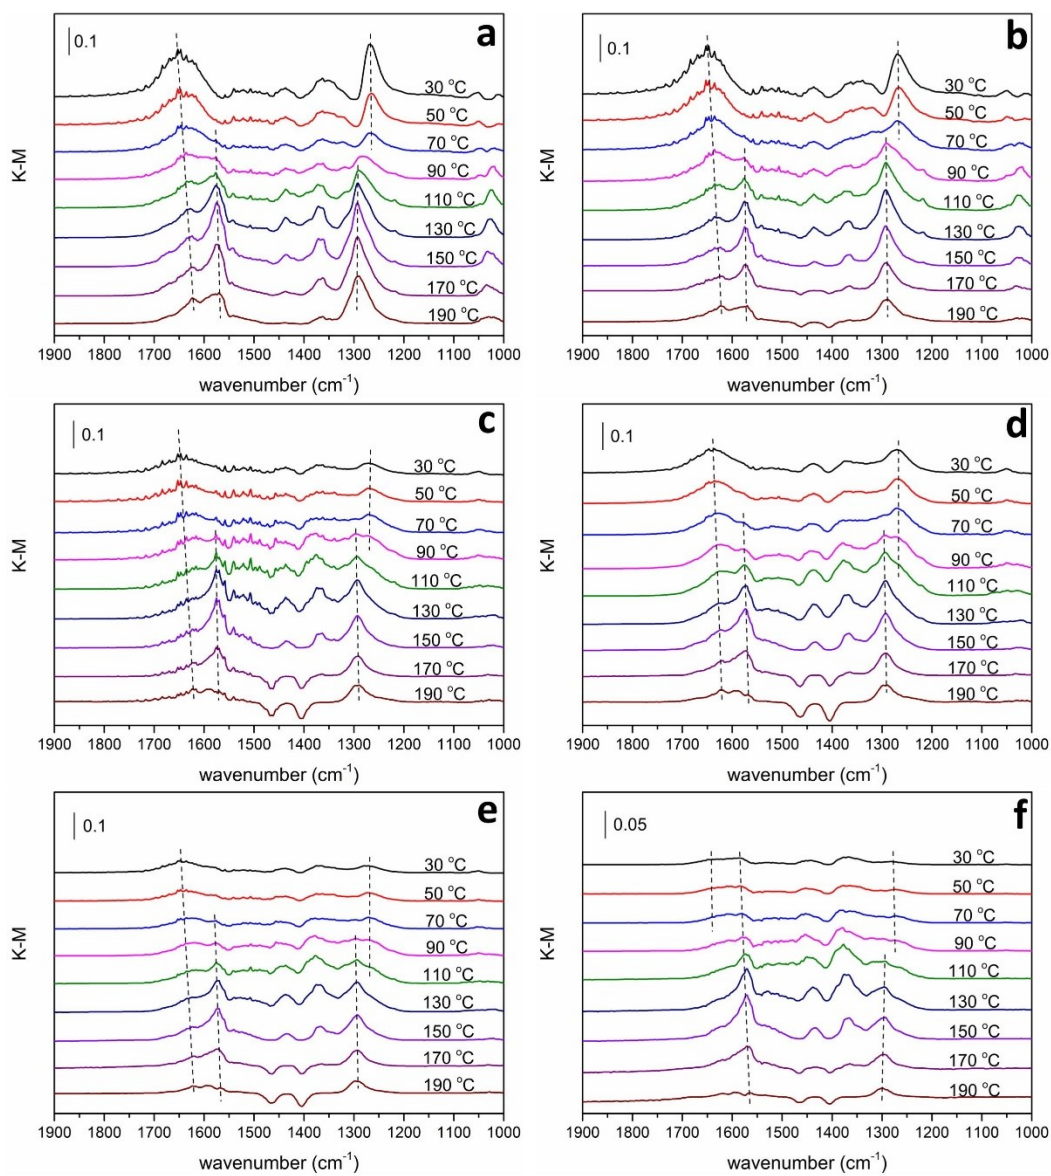

**Fig. S6** *In situ* DRIFTS spectra at 1000-1900 cm<sup>-1</sup> region of (a) 1CuCe, (b) 2CuCe, (c) 5CuCe, (d) 7CuCe, (e) 10CuCe and (f) 15CuCe under the H<sub>2</sub>+CO+O<sub>2</sub>+Ar reaction stream.

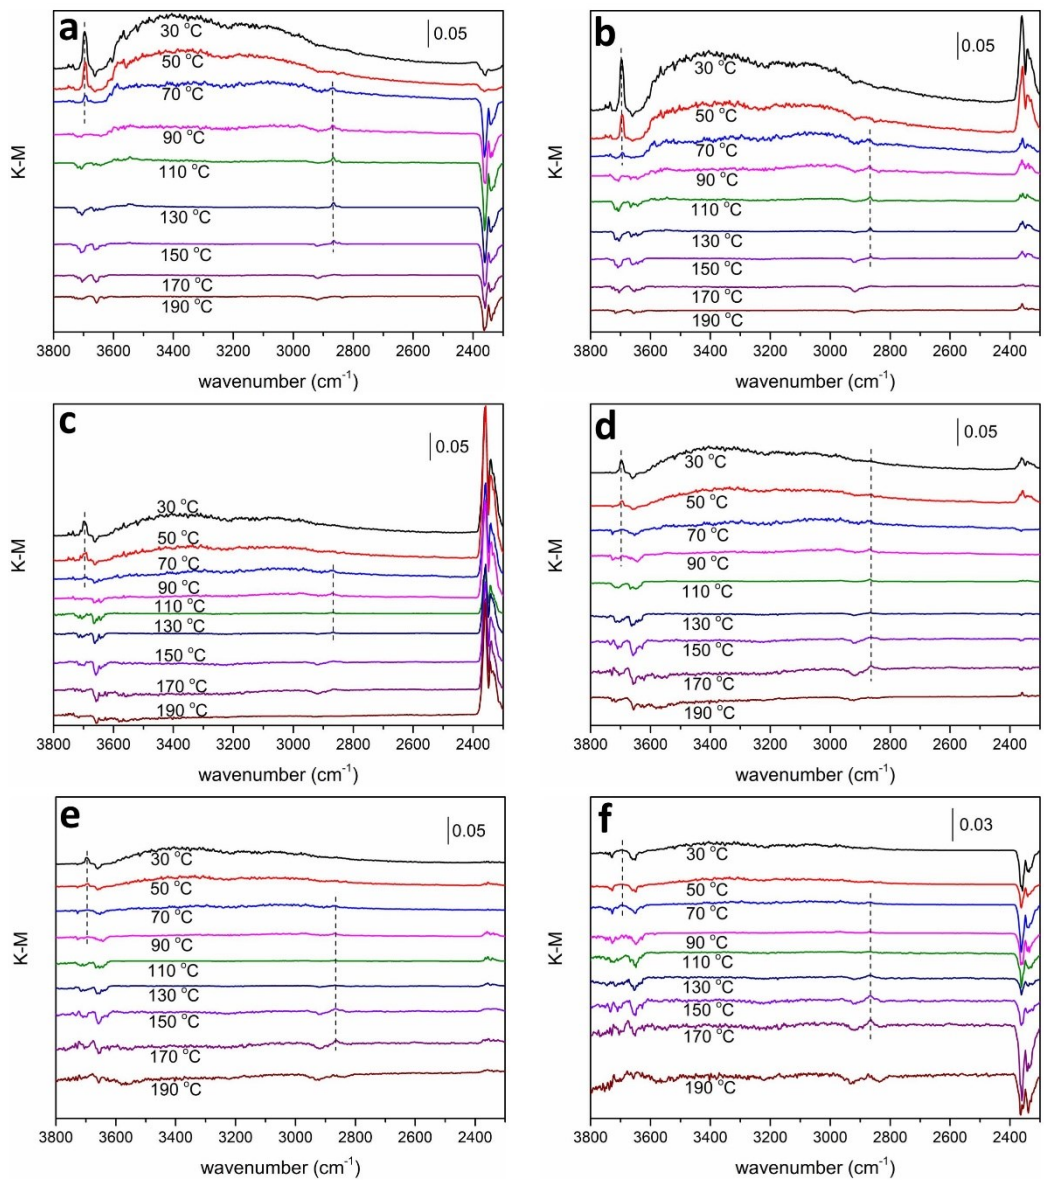

**Fig. S7** *In situ* DRIFTS spectra at 2300-3800 cm<sup>-1</sup> region of (a) 1CuCe, (b) 2CuCe, (c) 5CuCe, (d) 7CuCe, (e) 10CuCe and (f) 15CuCe under the H<sub>2</sub>+CO+O<sub>2</sub>+Ar reaction stream.
